# Supplementary figures and images for: Melanoma Stem Cells Educate Neutrophils to Support Cancer Progression
Source: MDPI journal article supplement (doi:10.3390/cancers14143391), 2022-07-13

P-ERK

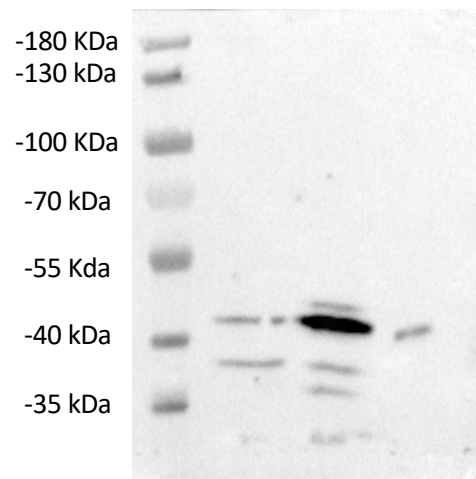

ERK

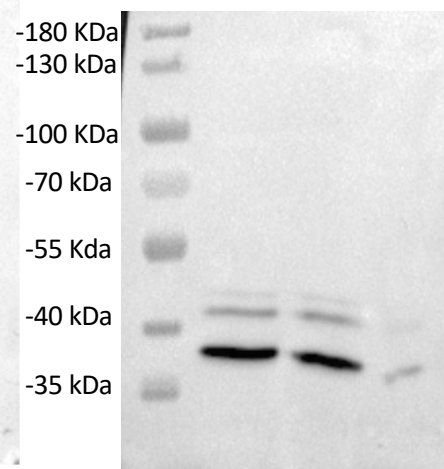

GAPDH

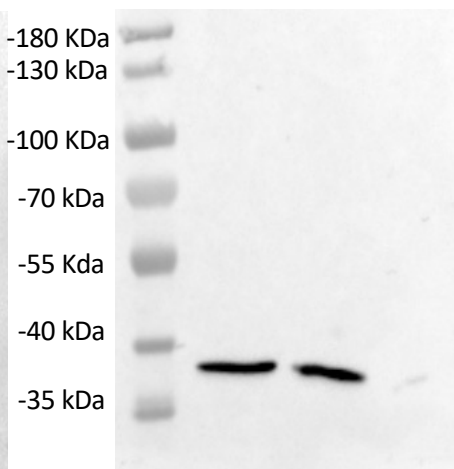

P-STAT3

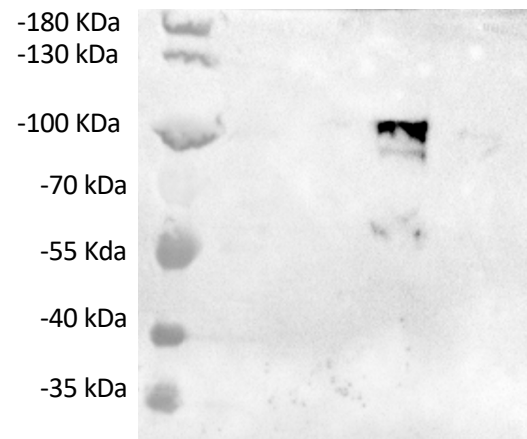

STAT3

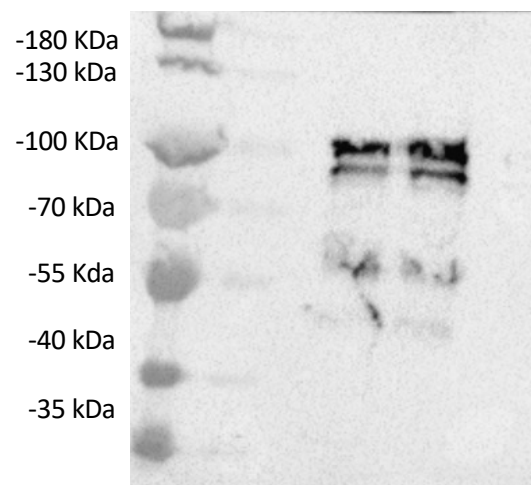

NF-kB

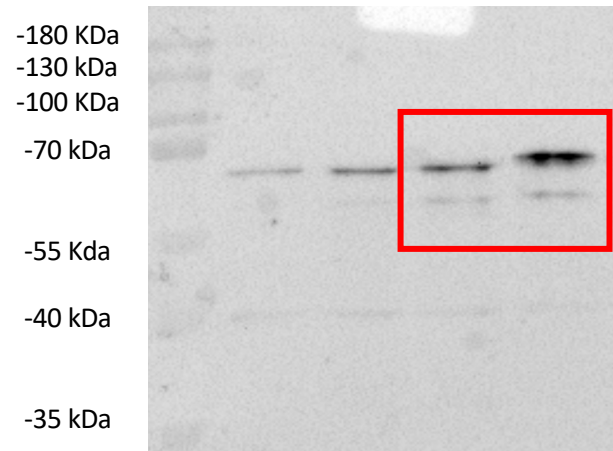

GAPDH

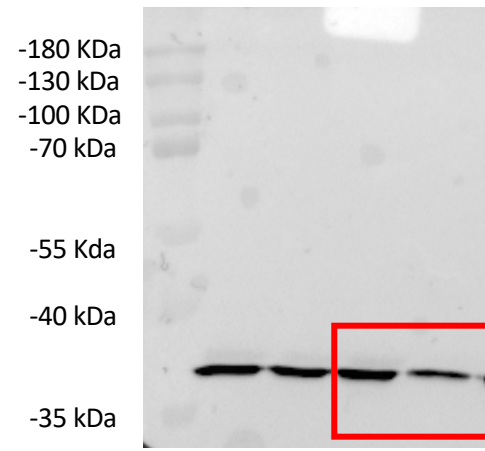

ABCG-2

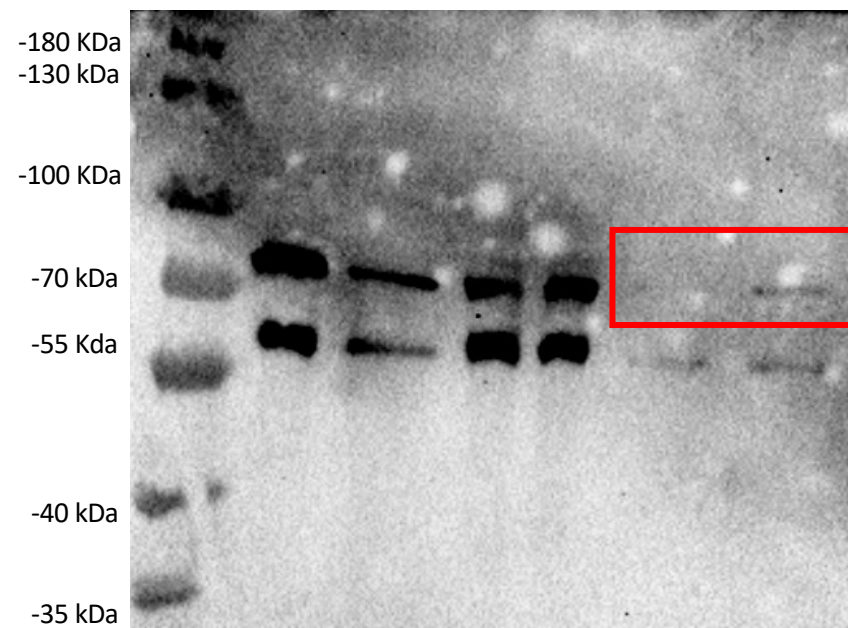

GAPDH

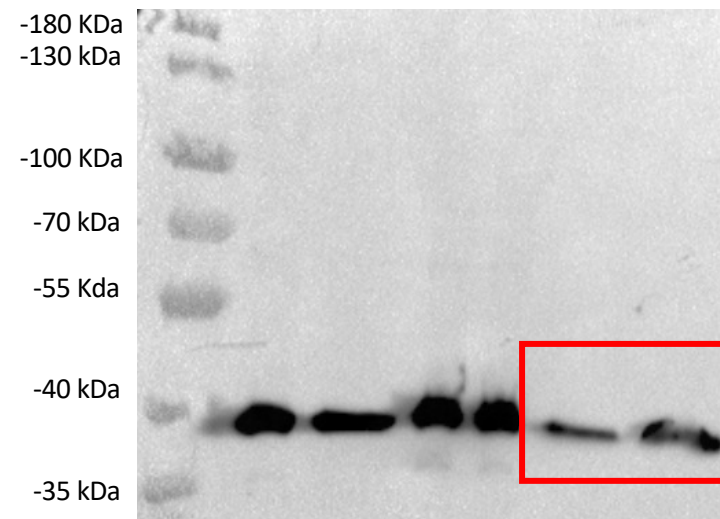

Supplement: s1 [file s1]
